1 **Long-term dysbiosis promotes insulin resistance during obesity despite rapid diet-induced**  
2 **changes in the gut microbiome of mice**

3  
4 **Kevin P. Foley, Emmanuel Denou, Brittany M. Duggan, Rebecca Chan, Jennifer C.**  
5 **Stearns, Jonathan D. Schertzer**

6  
7 *Department of Biochemistry and Biomedical Sciences, Farncombe Family Digestive Health*  
8 *Research Institute, McMaster University, Hamilton, ON, L8N 3Z5 Canada.*

9  
10 **Running title:** Microbiota promote chronic dysglycemia

11 **Figures:** 6

12 **Word count:** 4,136

13 **Key words:** gut, microbiome, obesity, adipose, diabetes, glucose, insulin, inflammation

14  
15 **Corresponding author:**  
16 Dr. Jonathan D. Schertzer  
17 Department of Biochemistry and Biomedical Sciences  
18 Faculty of Health Sciences  
19 McMaster University  
20 HSC 4H30D; 1200 Main Street West  
21 Hamilton, Ontario, Canada, L8N 3Z5  
22 [schertze@mcmaster.ca](mailto:schertze@mcmaster.ca)

23  
24  
25  
26  
27

28 **Abstract**

29 The intestinal microbiota and insulin sensitivity are rapidly altered in response to a high fat diet  
30 (HFD). It is unclear if gut dysbiosis precedes insulin resistance or vice versa. The initial triggers  
31 of diet-induced insulin resistance can differ from mechanisms underlying chronic dysglycemia  
32 during prolonged obesity. It is not clear if intestinal dysbiosis contributes to insulin resistance  
33 during short-term or long-term HFD-feeding. We found that diet-induced changes in the  
34 composition of the fecal microbiome preceded changes in glucose and insulin tolerance at both  
35 the onset and removal of a HFD in mice. Dysbiosis occurred after 1-3 days of HFD-feeding,  
36 whereas insulin and glucose intolerance manifested by 3-4 days. Antibiotic treatment did not  
37 alter glucose tolerance during this short-term HFD period. Conversely, antibiotics improved  
38 glucose tolerance in mice with protracted obesity caused by long-term HFD feeding for over 2  
39 months. We also found that microbiota transmissible glucose intolerance only occurred after  
40 prolonged diet-induced dysbiosis. Germ-free mice had impaired glucose tolerance when  
41 reconstituted with the microbiota from long-term, but not short-term HFD-fed animals. Our  
42 results are consistent with intestinal microbiota contributing to chronic insulin resistance and  
43 dysglycemia during prolonged obesity, despite rapid diet-induced changes in the taxonomic  
44 composition of the fecal microbiota.

45

46

47

48

49

50

51 Type 2 diabetes (T2D) is characterized by dysglycemia, which can manifest from insulin  
52 resistance and insufficient insulin secretion. Insulin resistance can last for many years and the  
53 majority of individuals with features of prediabetes, such as glucose intolerance, eventually  
54 develop T2D<sup>1</sup>. Environmental factors such as diet and exercise contribute to the increased  
55 prevalence of prediabetes, which coincides with increased incidences of obesity<sup>2</sup>. The  
56 composition of the intestinal microbiota can also influence postprandial glucose responses<sup>3</sup>. This  
57 adds microbes to the list of environmental factors that can influence glucose tolerance and  
58 possibly T2D risk. The composition of the gut microbiota is altered in obesity, T2D and by  
59 insulin sensitizing drugs<sup>4-6</sup>. However, it is not clear how the microbiota contributes to the  
60 progression of glucose intolerance versus obesity. This is an important distinction because not all  
61 obese individuals develop insulin resistance, glucose intolerance or T2D. Further, the timing and  
62 progression of obesity can be different from and dysglycemia.

63

64 The intestinal microbiota can contribute to host energy balance and lipid deposition through  
65 hormonal cues<sup>7</sup>. Gut dysbiosis during obesity is sufficient to increase adiposity, independently of  
66 host genetics<sup>8,9</sup>. Hence, there is a strong connection between the microbiota and obesity, but it is  
67 not clear if a microbiota-induced change in adiposity is the primary factor contributing to glucose  
68 intolerance. Increased adiposity correlates with glucose intolerance, but there may be other  
69 microbiota-driven mechanisms that alter blood glucose and insulin sensitivity. Microbes can  
70 influence circulating metabolites such as branched chain amino acids and consequently alter  
71 insulin sensitivity<sup>10</sup>. In addition, microbial components can subvert the intestinal or other  
72 mucosal barriers to promote inflammation and glucose intolerance<sup>11,12</sup>. Conversely, microbiota

73 transfer from lean donors can increase peripheral insulin sensitivity in obese patients,  
74 independent of changes in adiposity<sup>13</sup>.

75

76 Diet is a key factor in the development of obesity and a dominant factor shaping the composition  
77 of the microbiota. In mice, diet influences the composition of the gut microbiome more than host  
78 genetics and it is already known that increasing dietary fat content can rapidly perturb the  
79 composition of the microbiota within days<sup>14</sup>. A high fat diet (HFD) induces obesity, insulin  
80 resistance and glucose intolerance in rodents. However, the mechanisms underpinning glucose  
81 intolerance during the initial stages of HFD feeding are different than those governing chronic  
82 glucose intolerance during prolonged HFD-induced obesity. For example, ectopic lipid  
83 accumulation in the skeletal muscle and liver is associated with glucose intolerance after the first  
84 few days of HFD feeding, whereas metabolic tissue inflammation plays a more prominent role in  
85 propagating glucose intolerance after months of HFD-feeding in mice<sup>15</sup>. It is not clear if HFD-  
86 induced changes in the microbiota contribute to the mechanisms underpinning acute versus  
87 chronic insulin resistance and glucose intolerance.

88

89 We found that HFD-induced changes in the composition of the microbiota preceded overt  
90 dysglycemia in mice. Hence, we hypothesized that dysbiosis caused by both short-term and long-  
91 term HFD-feeding would promote increased fat accumulation and glucose intolerance. However,  
92 we found that only long-term HFD-feeding promoted transmissible glucose intolerance, which  
93 can occur independently of changes in adiposity.

94

95 **Results**

## 96 **Short-term HFD feeding causes glucose intolerance in mice**

97 Glucose tolerance was not different after 1 or 2 days of HFD-feeding (Fig. 1A, S1A). Insulin  
98 intolerance was evident after 3 days of feeding mice a 60% HFD, but not 3 days of 45% HFD  
99 (Fig. S1B). Four days of HFD-feeding marked the first time that both 45% and 60% HFD caused  
100 glucose intolerance compared to mice fed a chow diet (Fig. 1B). Glucose intolerance persisted  
101 after 14 days (Fig. 1C) and 14 weeks of feeding 45% or 60% HFD (Fig. 1D). Insulin intolerance  
102 was evident after 7 days and 12 weeks of either 45% or 60% HFD-feeding (Fig. S1C, D). The  
103 60% HFD caused higher glucose intolerance and higher insulin intolerance compared to the 45%  
104 HFD, when tested between 4 days and 14 weeks of HFD-feeding (Fig. 1, S1). These results show  
105 that it takes 3-4 days of HFD feeding to cause glucose and insulin intolerance in mice. These  
106 results also show that the percentage of dietary fat is directly related to the level of glucose and  
107 insulin intolerance in mice.

108

## 109 **Increased adiposity precedes glucose intolerance HFD-fed mice**

110 A single day of feeding either 45% or 60% HFD increased body mass compared to chow-fed  
111 mice (Fig. 1E). Between 4-7 days of HFD-feeding, a 60% HFD caused a greater change in body  
112 mass compared to a 45% HFD (Fig. 1E). A single day of feeding 60% HFD increased adiposity  
113 (i.e. body fat percentage), whereas it took 3 days of feeding a 45% HFD to detect an increase in  
114 whole body adiposity (Fig. 1F). Between 3-7 days of HFD feeding, a 60% HFD caused a greater  
115 increase in adiposity compared to feeding mice a 45% HFD (Fig. 1F). These results show that: 1)  
116 a single day of HFD-feeding increased body mass and body fat percentage and 2) the dietary fat  
117 content is directly related to the level of adiposity during the first week of HFD-feeding.

118

119 **HFD-induced changes in the microbiome precede glucose intolerance in mice**

120 We next assessed the timing of changes in the taxonomy and predicted metagenomic  
121 characteristics of the fecal microbiome during the first week of HFD-feeding. The Bray-Curtis  
122 similarity index of fecal bacterial DNA showed that the bacterial community was different in  
123 chow fed mice (i.e. day 0), compared to mice fed a 45% or 60% HFD for 7 days (Fig. 2A, B).  
124 The similarity matrix showed a progressive increase between day 1 and day 4 of feeding a 45%  
125 HFD diet (Fig. 2A). Only 1 day of 60% HFD-feeding equated to Bray-Curtis similarity index  
126 that was similar to 7 days on the 60% HFD diet (Fig. 2B). Supplemental Figure 2 shows phylum  
127 level changes in the feces of mice when fed chow, 45% or 60% HFD for up to 98 days (i.e. 14  
128 weeks). The Firmicutes/Bacteroidetes ratio was increased by 2-3 days of HFD-feeding, where  
129 the 60% HFD caused a larger magnitude of change in this ratio (Fig. 2C).

130

131 We then focussed on the 3<sup>rd</sup> day of HFD-feeding, since this time-point preceded overt glucose  
132 and insulin intolerance due to both 45% and 60% HFD. Three days of feeding mice either a 45%  
133 or 60% HFD equated to higher relative abundance of Firmicutes and lower abundance of  
134 Bacteroidetes (Fig. 2D). At the genus level, 3 days of feeding either HFD caused a striking  
135 increase in the relative abundance of *Lactococcus* and *Streptococcus* (Fig. 2E). The relative  
136 abundance of Lachnospiraceae (f), *Alistipes*, and Bacteroidales (o) were decreased after 3 days of  
137 feeding of either HFD (Fig. 2E). *Akkermansia* was higher after 3 days of feeding a 45% HFD  
138 (Fig. 2E). Many aspects of taxonomic changes observed on Day 3 of HFD feeding were  
139 maintained at later time points of HFD feeding in mice (Fig. S2, S3).

140

141 Using phylogenetic investigation of communities by reconstruction of unobserved states  
142 (PICRUS<sub>t</sub>), our results showed that short-term HFD-feeding altered the predicted metagenome  
143 and that a 45% and 60% HFD had similar effects. In comparison to the feces from chow-fed  
144 mice, LDA (Linear Discriminant Analysis) Effect Size (LEFSe) analysis resulted in significant  
145 LDA scores for environmental processing, cellular processes, human diseases and metabolism  
146 after 3 days of feeding 45% HFD or 60% HFD (Fig. 2F, G). We previously showed that 12  
147 weeks of HFD-feeding decreased the PICRUS<sub>t</sub>-predicted genetic capacity of the fecal microbiota  
148 for metabolism and increased the predicted genetic capacity related to environmental information  
149 processing<sup>16</sup>. Here, our results after LEfSe analysis show that 3 days of feeding either a 45% or  
150 60% HFD promoted discordant effects on PICRUS<sub>t</sub>-predicted metabolism and environmental  
151 information processing pathways in the fecal microbiota (Fig 2F, G). Specifically, we found that  
152 3 days of HFD feeding caused an increase in the predicted genetic capacity for metabolism and a  
153 decrease in environmental information processing (Supplemental Table 1). Therefore, short-term  
154 HFD-induced effects on predicted genetic capacity for metabolism and environmental  
155 information processing were opposite to those during long-term HFD feeding.

156

157 We next analyzed glucose tolerance and microbiota composition after short-term removal of the  
158 HFD and replacement with a chow diet by feeding mice a 60% HFD for 14 days, then switching  
159 the mice to a chow diet for 2 days (i.e. Day 16) (Figure 3A). Despite HFD removal, the mice  
160 previously fed 60% HFD remained glucose intolerant and still had higher body mass when  
161 compared to age-matched chow-fed mice (Fig. 3B, C). The Bray-Curtis similarity matrix showed  
162 that the bacterial community was different 2 days after removing a 60% HFD (Fig. 3D). When  
163 compared to 14 days of HFD-feeding, this similarity matrix showed that only 2 days of returning

164 mice to a chow diet after 14 days of HFD-feeding resembled the difference seen in mice  
165 continually fed a chow diet for 14 or 16 days (Fig. 3D). Average phylum level changes in the  
166 feces of mice fed a chow diet or a 60% HFD and removal back to chow for 2 days are shown in  
167 Figure S3A. At the phylum level, 14 days of HFD-feeding equated to a higher  
168 Firmicutes/Bacteroidetes ratio compared to chow-fed mice, but replacing the HFD with a chow  
169 diet for 2 days resulted in a lower Firmicutes/Bacteroidetes ratio to a level that was similar to  
170 mice continually fed a chow diet for 14 or 16 days (Fig. 3E). Removing the HFD for 2 days also  
171 restored HFD-induced changes in the relative abundance of Firmicutes and Bacteroidetes, but  
172 not Verrucomicrobia (Fig. 3F). At the genus level, many of the same changes observed after 7  
173 days of HFD were also evident after 14 days of a 60% HFD (Fig. 3G, S3B). A notable exception  
174 was *Akkermanisia*, which was lower after 14 days of 60% HFD-feeding (Fig. 3G). Replacing the  
175 HFD with a chow diet for 2 days reduced the abundance of *Lactococcus* and increased members  
176 of the order Bacteroidales to levels observed in chow-fed controls (Fig. 3G). Genus-level  
177 changes over the first 2 weeks of feeding a 45% or 60% HFD, plus removal of the HFD for 2  
178 days are shown in Supplemental Figure 3B. Overall, these data show that diet-induced changes  
179 in fecal microbiome precede changes in glucose and insulin intolerance at both the onset and  
180 removal of a HFD. These data also show that the magnitudes of change in the microbiome are  
181 directly related to the fat content of the diet.

182

### 183 **Antibiotics attenuate glucose intolerance caused by long term, but not short term HFD**

184 We next used antibiotics to mitigate diet-induced changes in the microbiota in order to test if  
185 short-term changes in microbes correspond with altered glycemia. We have previously  
186 established an antibiotic cocktail that causes profound changes in the gut microbiota and



187 attenuates insulin resistance after prolonged HFD-feeding<sup>17</sup>, which has also been described by  
188 others<sup>11</sup>. The conditions for this experiment were based on our results showing that 4 days of  
189 HFD-feeding is sufficient to cause glucose intolerance (Fig. 1B). Mice were treated with  
190 antibiotics (0.5 g/L neomycin and 1.0 g/L ampicillin in the drinking water), which commenced 3  
191 days prior to feeding a 60% HFD and continued for 4 days of HFD feeding (Fig 4A). This 7 day  
192 antibiotic treatment did not prevent glucose intolerance (Fig 4B) or hyperglycemia (Fig 4C)  
193 induced by feeding a 60% HFD for 4 days. Despite a small reduction in body mass (Fig 4C),  
194 antibiotics did not prevent increased adiposity or cause a change in fat mass during this short-  
195 term HFD-feeding (Fig. 4D). We next used this same antibiotic regimen to change the  
196 microbiota of mice fed a HFD for a longer period of time. Mice were fed a 60% HFD for 13  
197 weeks followed by 7 days with or without antibiotics (Fig 4E). HFD-fed mice that received  
198 antibiotics showed improved glucose tolerance (Fig 4F) and lower fasting blood without changes  
199 in body mass (Fig. 4G). Overall, these results show that changing the microbiota with a specific  
200 antibiotic cocktail attenuated glucose intolerance and hyperglycemia after long-term, but not  
201 short-term HFD-feeding.

202

203 **Microbiota from long-term, but not short-term HFD-feeding is sufficient to promote**  
204 **glucose intolerance**

205 We next reconstituted germ-free mice to test if short-term HFD-induced changes in the  
206 microbiome are sufficient to promote dysglycemia. We first tested the cumulative effect of short-  
207 term diet-induced changes in microbiota over the first 6 weeks by continually exposing chow fed  
208 germ-free mice to the feces from donor mice fed a 60% HFD or chow diet (Fig 5A). Germ-free  
209 mice that received daily feces from 60% HFD mice or chow fed mice had similar glucose

210 tolerance, fasting blood glucose, and percent body fat on day 4 (Fig 5C) and day 14 (data not  
211 shown) after microbiota reconstitution. However, after 45 days of microbiota reconstitution  
212 germ-free mice that received feces from 60% HFD mice were more glucose intolerant and had  
213 greater % body fat than those that received feces from chow fed mice (Fig. 5D). Phylum (Fig  
214 5B) and genus (Fig 5E) level analysis shows microbial abundance in the feces of donor and  
215 recipient mice at day 45. Principle coordinate analysis (PCoA) and permutational analysis of  
216 variance (PERMANOVA – adonis) of Bray-Curtis dissimilarities show that changes in diet alter  
217 the beta diversity of the microbiota (Fig 5F). Specifically, ingesting a 60% HFD or receiving  
218 donor feces from mice fed this HFD altered the composition of the microbiota compared to a  
219 chow fed mouse (Fig 5F). Of note was the lack of transfer of *Lactococcus* from HFD donor mice  
220 to GF chow mice. This suggests that *Lactococcus* is present in the diet and not a major  
221 contributor to the observed metabolic phenotype. We also collected the feces from mice fed a  
222 60% HFD for 4 days or a chow diet in order to specifically test repeated oral gavage of fecal  
223 slurry from this short term HFD. Germ-free mice that were gavaged (every 4 days) with the fecal  
224 slurry from HFD-fed or chow fed donor mice showed no difference in body mass, percentage  
225 body fat, glucose tolerance or insulin tolerance when tested on day 4 or day 25 after  
226 reconstitution (data not shown).

227

228 Finally, we reconstituted germ-free mice with the feces from donor mice that had been on a HFD  
229 for over 2 months and tested the effects on glycemia (Fig 6A). Mice that were used as microbiota  
230 donors were fed a chow or 60% HFD for 4 weeks prior to the experiment in order to discern if  
231 long term exposure of donor or recipient mice was the driver of changes in glycemia. Germ-free,  
232 recipient mice that were all fed a chow diet, but received daily feces from chow-fed or HFD-fed

233 donors, had similar body mass, percentage body fat, and glucose tolerance when tested on day 4  
234 (Fig 6C) or day 18 (data not shown) after reconstitution. However, recipient mice had increased  
235 glucose intolerance without changes in adiposity when tested 45 days after reconstitution with  
236 the microbiota from long term, HFD-fed donor mice (Fig. 6D). Phylum (Fig 6B) and genus (Fig  
237 6E) level analysis shows microbial abundance in the feces of donor and recipient mice at day 45  
238 when donor mice were on the HFD for 28 days prior to fecal transfer. PCoA and PERMANOVA  
239 (adonis) of Bray-Curtis dissimilarities again shows that ingesting a 60% HFD or receiving donor  
240 feces from mice fed a HFD altered the composition of the microbiota compared to a chow fed  
241 mouse (Fig 6F). These results show that the microbiota from long-term HFD feeding is sufficient  
242 to promote glucose intolerance when chow-fed mice are exposed to this dysbiosis for over a  
243 month (i.e. 45 days), but not for shorter duration such as 4 or 18 days.

244

## 245 **Discussion**

246 Environmental factors such as diet influence the risk of obesity, prediabetes and T2D. Obesity  
247 coincides with characteristics of prediabetes such as insulin resistance and glucose intolerance.  
248 The microbiota has emerged as a factor in obesity, but less is known about how the microbiota  
249 could connect the progression of obesity to the progression of prediabetes. Diet-induced  
250 dysbiosis is positioned to contribute to both obesity and glucose intolerance, but two ill-defined  
251 concepts were: 1) the timing of changes in the constituents of the microbiota relative to the onset  
252 of obesity and glucose intolerance and 2) whether dysbiosis contributes to dysglycemia via  
253 changes in adiposity during acute or chronic obesity.

254

255 We fed mice with two commonly used HFD and tracked the timing of taxonomic changes in the  
256 fecal microbiota versus the onset of glucose intolerance and changes in adiposity. It was known  
257 that HFD-feeding induces obesity and alters the gut microbiota. However, it was still not clear if  
258 diet-induced changes in the microbiota precede glucose intolerance or vice versa. We found that  
259 both a 45% and 60% HFD rapidly altered the constituents of the microbiota, which preceded  
260 overt changes in glucose tolerance in mice. Consistent with previous reports, we found that the  
261 fat content of the diet related directly to the magnitude of changes in microbial taxonomy<sup>14</sup>. We  
262 showed that these changes in the composition of the microbiota (and dietary fat content) directly  
263 related to the magnitude of glucose intolerance. We then showed that removal of the HFD, back  
264 to a chow diet (for only 2 days) caused a rapid reversion of the fecal microbiota such that many  
265 taxonomic markers resembled those of mice continually chow fed mice, an effect that is also  
266 consistent with previous findings in mice<sup>14</sup>. We extended these findings by showing that mice  
267 were still glucose intolerant after two days of replacing a HFD with a chow diet. We found that  
268 diet-induced changes in the constituents of the fecal microbiota precede and predict the  
269 magnitude of glucose intolerance in mice. Overall, our results are consistent with a model where  
270 the presence of a HFD is the major factor influencing changes in fecal microbiota composition,  
271 rather than insulin resistance altering the microbiota. We also showed that the first 3 days of a  
272 HFD resemble many of the changes seen after 14 weeks of a HFD regarding changes in the  
273 microbiota composition. These results initially supported the concept of using changes in the  
274 taxonomy of the microbiota as biomarkers of diet-induced glucose intolerance. However, the  
275 timing of divergent changes in the predicted microbial functional pathways such as metabolism  
276 and environmental information processing should be closely examined.

277

278 Subsequently, we used antibiotic treatment and reconstitution of germ-free mice to determine if  
279 diet-induced dysbiosis contributed to acute or chronic glucose intolerance. We also wanted to  
280 test if the rapid diet-induced dysbiosis caused features of prediabetes that were dependent on  
281 increased adiposity. It was already known that the constituents of the intestinal microbiota are  
282 altered in obesity and this dysbiosis can contribute to increased adiposity<sup>8,9</sup>. Our data showed  
283 that microbiota contributed to glucose intolerance, independent of changes in adiposity. In these  
284 experiments, we found that only long-term dysbiosis contributed to glucose intolerance. Despite  
285 rapid diet-induced changes in the constituents of the microbiota, we found no evidence of  
286 dysbiosis contributing to short-term HFD-induced glucose intolerance. Our results question the  
287 utility of using fecal microbial taxonomy as a biomarker for glucose intolerance during diet-  
288 induced obesity. Microbial function may be more important. We actually found that short term  
289 HFD feeding (for 3 days) altered the exact same predicted metagenomic annotations of  
290 metabolism and environmental information processing, which we have reported during long-  
291 term HFD feeding in mice<sup>16</sup>. However, short term HFD feeding affected these pathways in the  
292 opposite direction compared to long-term HFD feeding. Investigation of diet-induced changes in  
293 microbial function compared to taxonomy is warranted and it may be more useful to measure  
294 microbial-derived metabolites that can alter insulin resistance<sup>18</sup>.

295  
296 Our results provide insight into the mechanism of dysbiosis-driven changes in glucose tolerance.  
297 It has previously been shown that metabolic inflammation contributes to insulin resistance and  
298 glucose intolerance during prolonged, but not short-term HFD-feeding<sup>15</sup>. Our results are  
299 consistent with microbiota contributing to glucose intolerance through metabolic inflammation  
300 during prolonged obesity. It is not clear how to reconcile our results in mice with recent results

301 showing that 7 days of vancomycin or amoxicillin treatment had no impact on insulin sensitivity  
302 or substrate metabolism in obese humans<sup>19</sup>. The specific antibiotic used could be a key variable  
303 since (so far) we have found that only a combination of ampicillin and neomycin improves  
304 glucose tolerance, an effect not seen with either antibiotic alone or with vancomycin in HFD-fed  
305 mice (data not shown). Other groups have also shown that specific combinations of antibiotics  
306 improve glucose tolerance in obese mice<sup>11,20</sup>, but it is not yet clear if there is a difference  
307 between mice and humans.

308

309 The constituents of the microbiota are modifiable, which may provide therapeutic targets in  
310 obesity and prediabetes. Our results show that diet-induced dysbiosis can influence glucose  
311 tolerance independently of obesity. Therefore, microbiota-based interventions such as pre-and  
312 probiotics may be able to lower glucose intolerance and insulin resistance separately from  
313 obesity. Our results showed that the duration of diet-induced obesity is an important  
314 consideration in microbiota-targeted strategies aimed at attenuating dysglycemia versus  
315 adiposity.

316

## 317 **Methods**

318 **Animal Experiments:** All procedures were approved by McMaster University Animal Ethics  
319 Review Board. Specific pathogen free (SPF) C57BL/6 mice were born at McMaster University.  
320 Littermate mice were randomly placed on a HFD, where either 45% or 60% of calories are  
321 derived from fat (Research Diets, D12451 and D12492) or a chow diet (~5% fat). Blood glucose  
322 measurements and glucose and insulin tolerance tests were done after 6 h of fasting, as described  
323 <sup>17,21</sup>. Body fat composition was measured using whole body echo-MRI (Bruker Minispec LF90-

324 II). Antibiotics (1.0 mg/mL ampicillin and 0.5 mg/mL neomycin) were provided in the drinking  
325 water and changed every 2 days. Germ-free C57BL/6 mice were obtained from the Farncombe  
326 Gnotobiotic Unit of McMaster University and at 8-10 weeks of age. Germ-free mice were  
327 immediately and continually colonized by housing mice in soiled litter from SPF C57BL/6 donor  
328 mice. Where indicated, germ-free mice were given oral gavage every 4 days with a fecal slurry  
329 obtained from donor mice. Mice were housed using ventilated racks, and handled only in the  
330 level II biosafety hood to prevent bacterial contamination<sup>17</sup>.

331 **Bacterial profiling:** Fecal samples were collected directly into sterile tubes and DNA was  
332 purified (Zymo Research Corporation: D6012), as described<sup>17</sup>. Illumina compatible PCR  
333 amplification of the variable 3 (V3) region of the 16S rRNA gene was completed on each  
334 sample. The Illumina MiSeq platform was used to sequence DNA products of this PCR  
335 amplification. A custom pipeline was used to process the FASTQ files, as previously described<sup>17</sup>.  
336 Operational Taxonomic Units (OTUs) were grouped using Abundant OTU+ based on 97%  
337 similarity. The 2011 version of the Greengenes reference database was used to assigned  
338 taxonomy to OTUs Ribosomal Database Project (RDP) classifier in Quantitative Insights Into  
339 Microbial Ecology (QIIME). QIIME and R scripts were used to calculate beta diversity using the  
340 Bray-Curtis dissimilarity and principal coordinate analysis, as previously described<sup>22</sup>.  
341 PERMANOVA were used to assess partitioning of variance in microbial communities with the  
342 adonis function from the vegan package in R<sup>23</sup>. Phylogenetic investigation of communities by  
343 reconstruction of unobserved states (PICRUSt) was used to predict the metagenome functional  
344 content from 16S rRNA gene data and group these into KEGG pathway maps, as described<sup>16</sup>.  
345 The LDA (Linear Discriminant Analysis) Effect Size (LEfSe) algorithm was used to identify

346 differences in abundance of PICRUSt annotated pathways, where an LDA cut-off score of 2.0  
347 and P value of 0.05 were used<sup>25</sup>. Sequencing characteristics are in Supplemental Table 1.

348

349 **Statistical analysis:** An unpaired, two-tailed Student's t-test was used to compare two groups.  
350 ANOVA and Tukey's post hoc analysis was used to compare more than two means.  
351 Subsequently, false discovery rate (FDR) was accounted for via implementation of the  
352 Benjamini-Hochberg multiple testing adjustment procedure using R, where FDR-corrected p-  
353 values were estimated for all taxonomic and PICRUSt data. After adjustment for FDR, statistical  
354 significance was accepted at  $p < 0.05$ .

355

356



357 **References**

- 358 1. Nathan, D. M. *et al.* Impaired fasting glucose and impaired glucose tolerance: implications  
359 for care. *Diabetes Care* **30**, 753–759 (2007).
- 360 2. Schellenberg, E. S., Dryden, D. M., Vandermeer, B., Ha, C. & Korownyk, C. Lifestyle  
361 interventions for patients with and at risk for type 2 diabetes: a systematic review and meta-  
362 analysis. *Ann. Intern. Med.* **159**, 543–551 (2013).
- 363 3. Zeevi, D. *et al.* Personalized Nutrition by Prediction of Glycemic Responses. *Cell* **163**,  
364 1079–1094 (2015).
- 365 4. Ley, R. E. *et al.* Obesity alters gut microbial ecology. *Proc. Natl. Acad. Sci. U. S. A.* **102**,  
366 11070–11075 (2005).
- 367 5. Qin, J. *et al.* A metagenome-wide association study of gut microbiota in type 2 diabetes.  
368 *Nature* **490**, 55–60 (2012).
- 369 6. Forslund, K. *et al.* Disentangling type 2 diabetes and metformin treatment signatures in the  
370 human gut microbiota. *Nature* **528**, 262–266 (2015).
- 371 7. Bäckhed, F. *et al.* The gut microbiota as an environmental factor that regulates fat storage.  
372 *Proc. Natl. Acad. Sci. U. S. A.* **101**, 15718–15723 (2004).
- 373 8. Ridaura, V. K. *et al.* Gut microbiota from twins discordant for obesity modulate metabolism  
374 in mice. *Science* **341**, 1241214 (2013).
- 375 9. Turnbaugh, P. J. *et al.* An obesity-associated gut microbiome with increased capacity for  
376 energy harvest. *Nature* **444**, 1027–1031 (2006).
- 377 10. Pedersen, H. K. *et al.* Human gut microbes impact host serum metabolome and insulin  
378 sensitivity. *Nature* (2016). doi:10.1038/nature18646

- 379 11. Cani, P. D. *et al.* Changes in gut microbiota control metabolic endotoxemia-induced  
380 inflammation in high-fat diet-induced obesity and diabetes in mice. *Diabetes* **57**, 1470–1481  
381 (2008).
- 382 12. Schertzer, J. D. *et al.* NOD1 activators link innate immunity to insulin resistance. *Diabetes*  
383 **60**, 2206–2215 (2011).
- 384 13. Vrieze, A. *et al.* Transfer of intestinal microbiota from lean donors increases insulin  
385 sensitivity in individuals with metabolic syndrome. *Gastroenterology* **143**, 913–916.e7  
386 (2012).
- 387 14. Carmody, R. N. *et al.* Diet dominates host genotype in shaping the murine gut microbiota.  
388 *Cell Host Microbe* **17**, 72–84 (2015).
- 389 15. Lee, Y. S. *et al.* Inflammation is necessary for long-term but not short-term high-fat diet-  
390 induced insulin resistance. *Diabetes* **60**, 2474–2483 (2011).
- 391 16. Denou, E., Marcinko, K., Surette, M. G., Steinberg, G. R. & Schertzer, J. D. High-intensity  
392 exercise training increases the diversity and metabolic capacity of the mouse distal gut  
393 microbiota during diet-induced obesity. *Am. J. Physiol. Endocrinol. Metab.* **310**, E982-993  
394 (2016).
- 395 17. Denou, E. *et al.* Defective NOD2 peptidoglycan sensing promotes diet-induced  
396 inflammation, dysbiosis, and insulin resistance. *EMBO Mol. Med.* **7**, 259–274 (2015).
- 397 18. Perry, R. J. *et al.* Acetate mediates a microbiome-brain- $\beta$ -cell axis to promote metabolic  
398 syndrome. *Nature* **534**, 213–217 (2016).
- 399 19. Reijnders, D. *et al.* Effects of Gut Microbiota Manipulation by Antibiotics on Host  
400 Metabolism in Obese Humans: A Randomized Double-Blind Placebo-Controlled Trial. *Cell*  
401 *Metab.* **24**, 63–74 (2016).

- 402 20. Membrez, M. *et al.* Gut microbiota modulation with norfloxacin and ampicillin enhances  
403 glucose tolerance in mice. *FASEB J. Off. Publ. Fed. Am. Soc. Exp. Biol.* **22**, 2416–2426  
404 (2008).
- 405 21. Schertzer, J. D. *et al.* A transgenic mouse model to study glucose transporter 4myc  
406 regulation in skeletal muscle. *Endocrinology* **150**, 1935–1940 (2009).
- 407 22. Caporaso, J. G. *et al.* QIIME allows analysis of high-throughput community sequencing  
408 data. *Nat. Methods* **7**, 335–336 (2010).
- 409 23. Oksanen, J *et al.* *vegan: Community Ecology Package.* (2016).
- 410 24. Langille, M. G. I. *et al.* Predictive functional profiling of microbial communities using 16S  
411 rRNA marker gene sequences. *Nat. Biotechnol.* **31**, 814–821 (2013).
- 412 25. Segata, N. *et al.* Metagenomic biomarker discovery and explanation. *Genome Biol.* **12**, R60  
413 (2011).

414

#### 415 **Author Contributions**

416 KPF researched the data, contributed to the discussion, and edited the manuscript. ED, BMD, RC  
417 researched the data. JCS analyzed data and contributed to discussion. JDS researched the data,  
418 derived the hypothesis, wrote the manuscript and is the guarantor of this work.

419

#### 420 **Funding**

421 KPF was supported by an NSERC fellowship. Supported by an operating grant to JDS from  
422 Natural Sciences and Engineering Research Council (NSERC). JDS holds CDA Scholar (SC-5-  
423 12-3891-JS) and CIHR New Investigator awards (MSH-136665).

#### 424 **Figures**

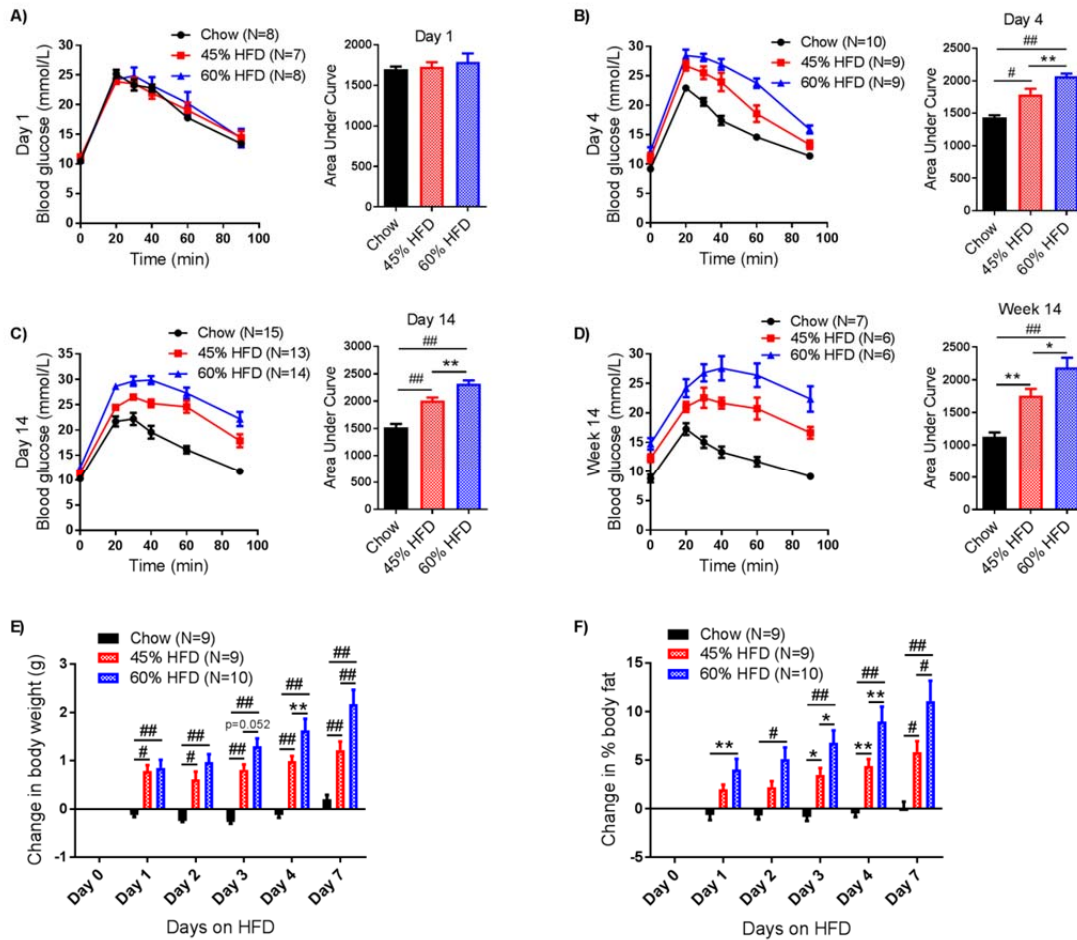

425  
 426 **Figure 1: High fat feeding for 4 days is sufficient to induce glucose intolerance and increase**  
 427 **adiposity in mice.** A-D) Mice were fed a chow, 45% HFD, or 60% HFD for 1 day (A: N=8, 7,  
 428 8), 4 days (B: N=10, 9, 9), 14 days (C: N=15, 13, 14), or 14 weeks (D: N=7, 6, 6) before being  
 429 tested for glucose tolerance with a 2 g/kg (A-C) or 0.9 g/Kg (D) dose by *i.p.* injection. Blood  
 430 glucose measures were taken at indicated time points. Each figure shows the GTT/ITT curve and  
 431 AUC. Statistical significance was measured as  $p < 0.05$  using one-way ANOVA. Post Hoc  
 432 analysis was performed using Tukey's multiple comparisons test (\*  $p < 0.05$ ; \*\*  $p < 0.01$ ; #  
 433  $p < 0.001$ ; ##  $p < 0.0001$ ). E-F) Body weight and adiposity were measured in mice fed a chow, 45%  
 434 HFD, or 60% HFD for 7 days (N= 9, 9, 10). Adiposity was measured as % body fat using whole  
 435 body echo-MRI imaging. Change in body weight (E) and change in % body fat (F) were  
 436 calculated as the difference between Day 0 and Day "X" measures within each animal. Statistical  
 437 significance was measured as  $p < 0.05$  using two-way ANOVA with repeated measures (time).  
 438 Post Hoc analysis was performed using Tukey's multiple comparisons test (\*  $p < 0.05$ ; \*\*  $p < 0.01$ ;  
 439 #  $p < 0.001$ ; ##  $p < 0.0001$ ).

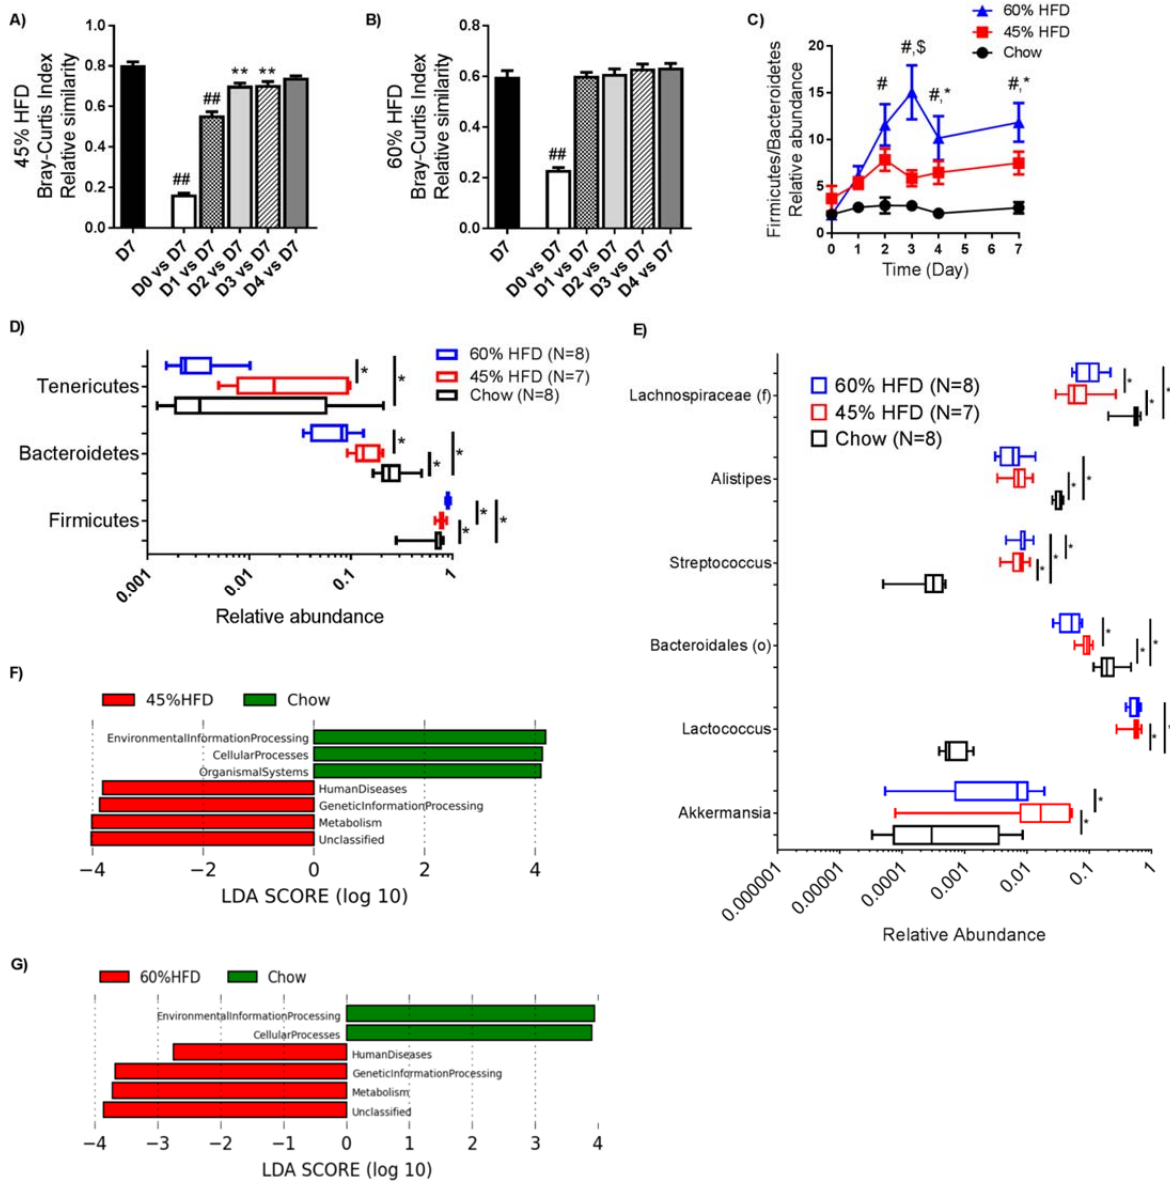

440

441 **Figure 2: High fat feeding induces changes in the fecal microbiota that precede glucose**  
 442 **intolerance in mice.** Fecal samples were taken over the first 7 days of high fat feeding and  
 443 processed for bacterial DNA sequencing (N=7-14). Beta-diversity was measured based on the  
 444 Bray-Curtis dissimilarity index relative to the microbial profile at day 7 in mice fed with 45%  
 445 (A) or 60% HFD (B) from Day 0 to 7. C) The Firmicutes/Bacteroidetes ratio over the first 7 days  
 446 of high fat feeding. Phylum (D) and Genus (E) level changes in the microbiome on Day 3 of high  
 447 fat feeding with 45% or 60% HFD. LDA scores from LefSe analysis of PICRUST-predicted  
 448 function 3 days after 45% (F) and 60% (G) HFD relative to chow diet. ANOVA was used for all  
 449 figures and false discovery rate was accounted for by controlling the familywise error rate using  
 450 the Bonferroni correction. Significance was accepted at  $p < 0.05$ . Panel A and B: \*  $p < 0.05$ ; \*\*  
 451  $p < 0.01$ ; #  $p < 0.001$ ; ##  $p < 0.0001$ ). Panel C: “\*” shows differences between chow and 45%; “#”  
 452 between chow and 60% and “\$” between 45% and 60% HFD profiles.

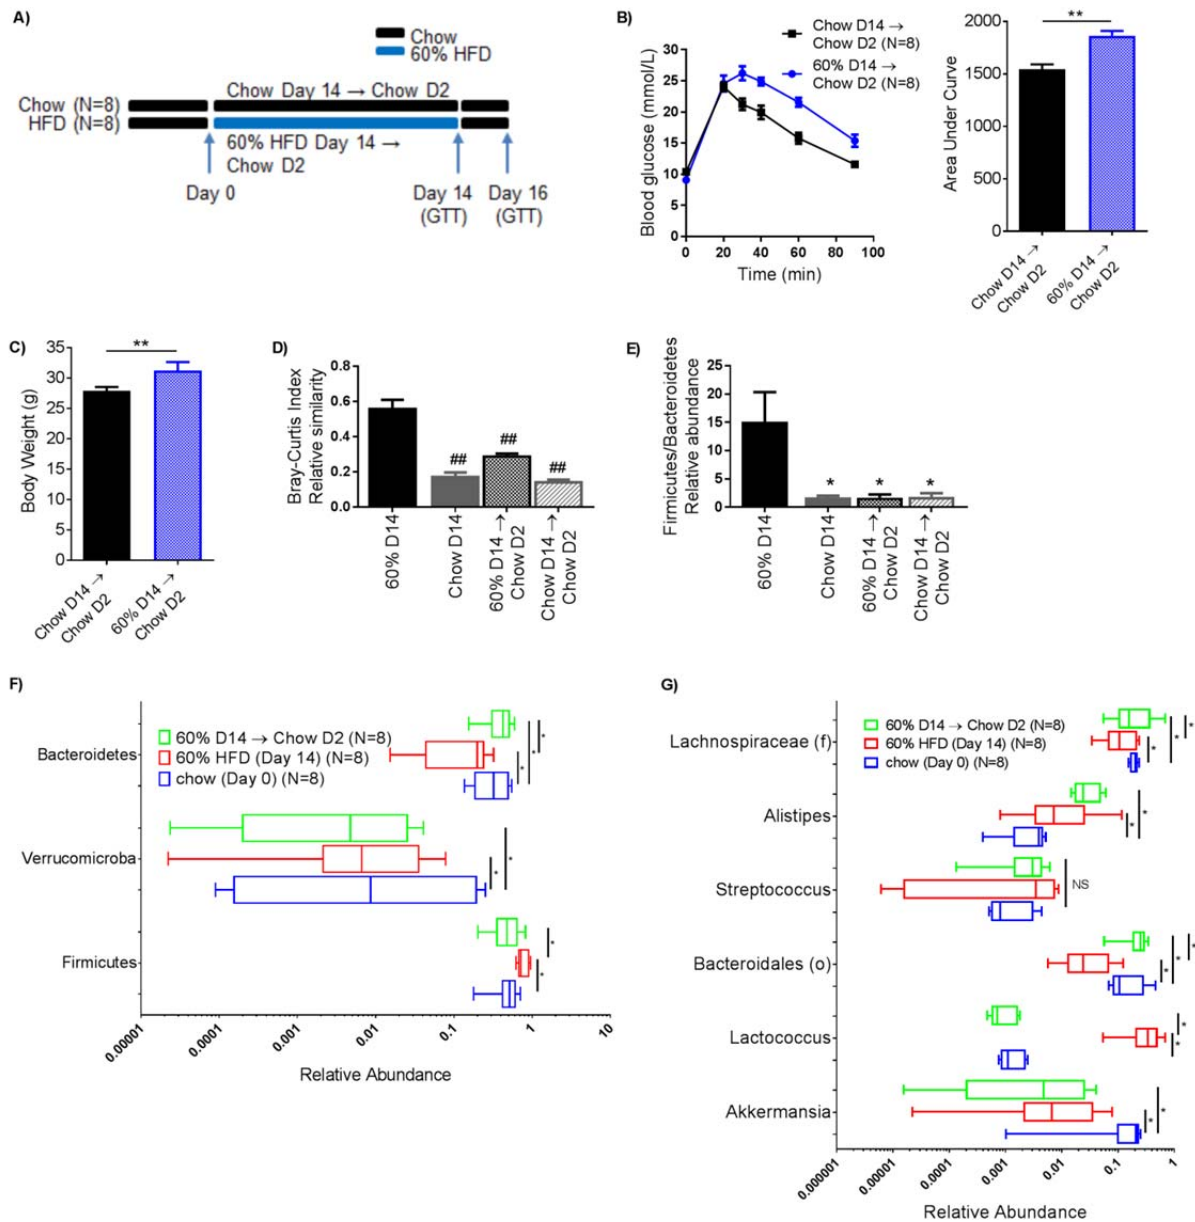

453

454 **Figure 3: Glucose intolerance cannot be reversed by 2 days of chow diet following 14 days**  
 455 **of HFD feeding.** Mice were fed chow or 60% HFD (N= 8, 8) for 14 days before HFD removal  
 456 for 2 days (Day 16) – schematic (A). B) GTT curve with AUC (2 g/Kg glucose, *i.p.*) and C) body  
 457 mass on day 16. D) Bray-Curtis dissimilarity index relative to Day 14 on HFD. E)  
 458 Firmicutes/Bacteroidetes abundance relative to Day 14 HFD. Phylum (F) and Genus (G) level  
 459 changes in the microbiome on Day 14 (60% HFD) and Day 16 (2 day HFD removal). Statistical  
 460 significance was measured as  $p < 0.05$  using Student t-test (B-C) or ANOVA (D, E) (\*  $p < 0.05$ ; \*\*  
 461  $p < 0.01$ ; #  $p < 0.001$ ; ##  $p < 0.0001$ ). For F and G ANOVA was used and false discovery rate was  
 462 accounted for by controlling the familywise error rate using the Bonferroni correction;  
 463 significance was accepted at  $p < 0.05$ .

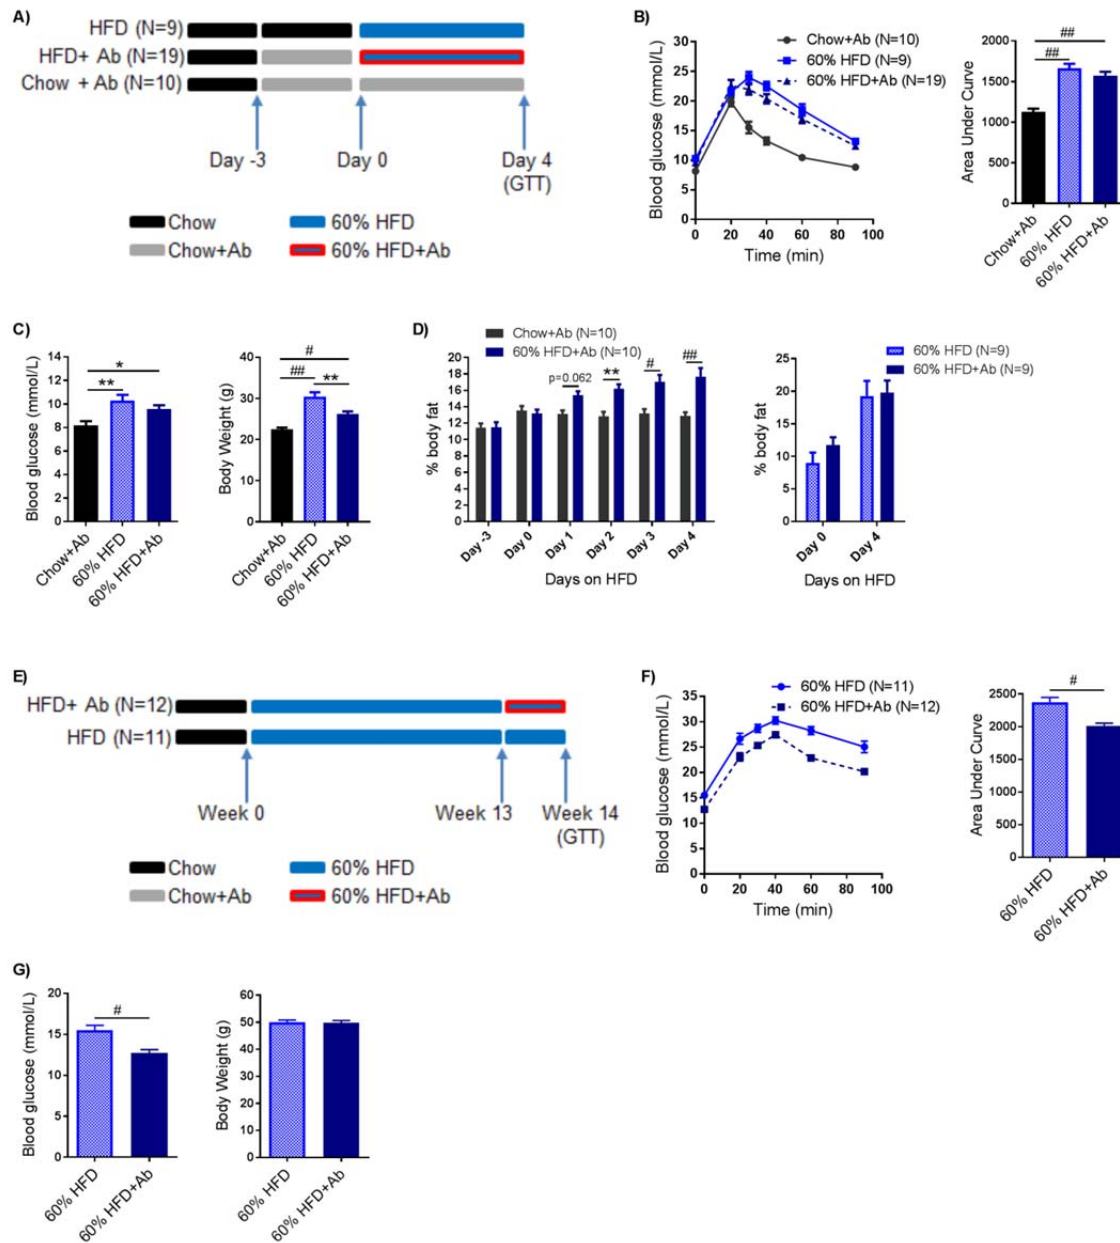

464 **Figure 4: Antibiotics improve glucose tolerance of mice fed long-term, but not short-term**  
 465 **HFD.** A) Mice were treated with or without antibiotics (1mg/mL ampicillin and 0.5 mg/mL  
 466 neomycin) in the water for 3 days before being placed on chow or 60% HFD with or without  
 467 antibiotics for an additional 4 days (Chow+Ab=10; HFD=9; HFD+Ab=19). These mice were  
 468 then tested for glucose tolerance (2 g/Kg glucose *i.p.*). GTT and AUC (B), fasting blood glucose  
 469 and body mass (C) and body fat % (D) were measured. E) After 13 weeks of HFD, mice were  
 470 treated with (N=12) or without (N=11) antibiotics (1mg/mL ampicillin and 0.5 mg/mL  
 471 neomycin) in the drinking water for 1 week during the HFD and glucose tolerance (GTT) and  
 472 AUC (F) and fasting blood glucose and body mass (G) were measured. Statistical significance  
 473 was measured as  $p < 0.05$  using one-way ANOVA (B, C), Student t-test (F, G), or two-way  
 474 ANOVA (D) with repeated measures (time). Post Hoc analysis was performed using Tukey's  
 475 multiple comparisons test (\*  $p < 0.05$ ; \*\*  $p < 0.01$ ; #  $p < 0.001$ ; ##  $p < 0.0001$ ).

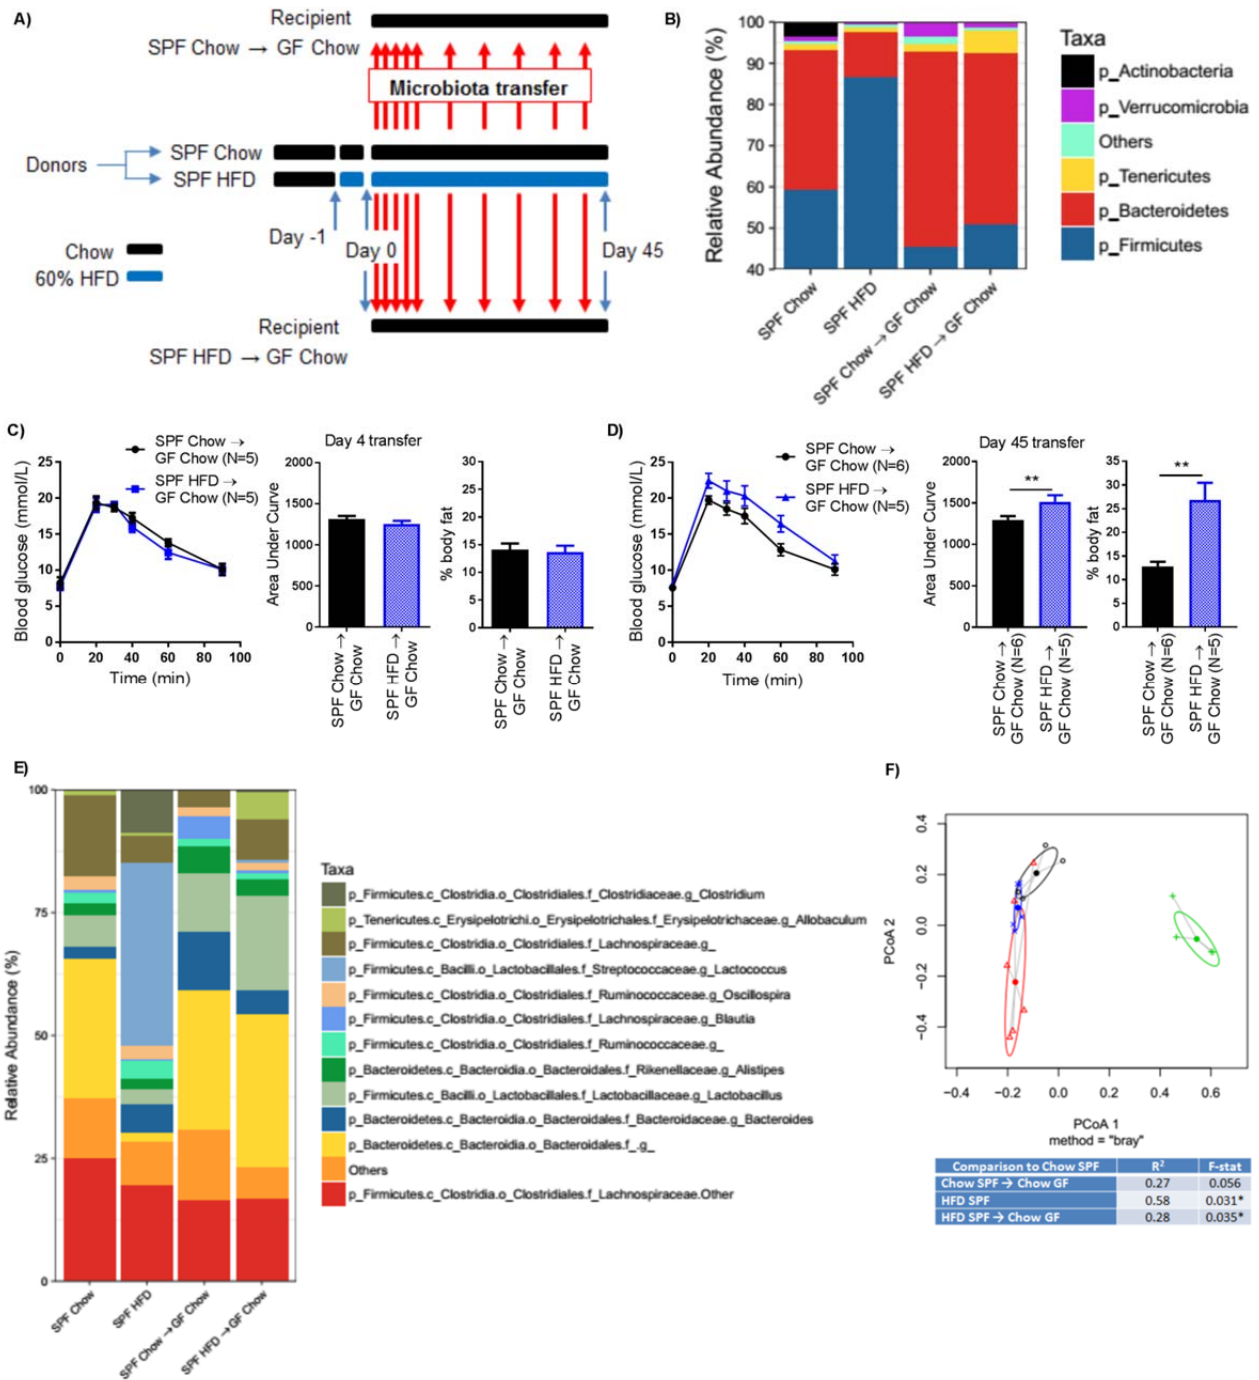

476  
477  
478  
479  
480  
481  
482



483  
484  
485  
486  
487  
488  
489  
490  
491  
492  
493  
494  
495  
496  
497  
498  
499  
500  
501  
502  
503  
504

**Figure 5: Gut microbiota from long-term, but not short-term HFD-fed mice causes glucose intolerance in germ-free mice.** A) Schematic of experimental design. Donor mice were placed on chow or 60% HFD on Day -1. On Day 0, and each subsequent day, feces were transferred from donor chow or donor HFD cages to germ-free recipients fed chow diet. After 7 days feces were transferred once per week. B) Phylum level abundance of donor and germ free recipient feces after 45 days of microbiota transfer. On Day 4 (C) and Day 45 (D) of microbiota transfer (previously) germ-free, recipient mice were tested for glucose tolerance (N=5, 5). GTT, AUC, and % body fat are shown. Statistical significance was measured with a Student t-test (\*\*p<0.01). E) Genus level abundance of donor and germ free recipient feces after 45 days of microbiota transfer. F) PCoA on Bray-Curtis dissimilarities (black = SPF Chow; green = SPF HFD; red = SPF Chow → GF Chow; blue = SPF HFD → GF Chow) and sources of variation due to each treatment assessed by PERMANOVA relative to the microbial profile in Chow donor mice (Day 45).

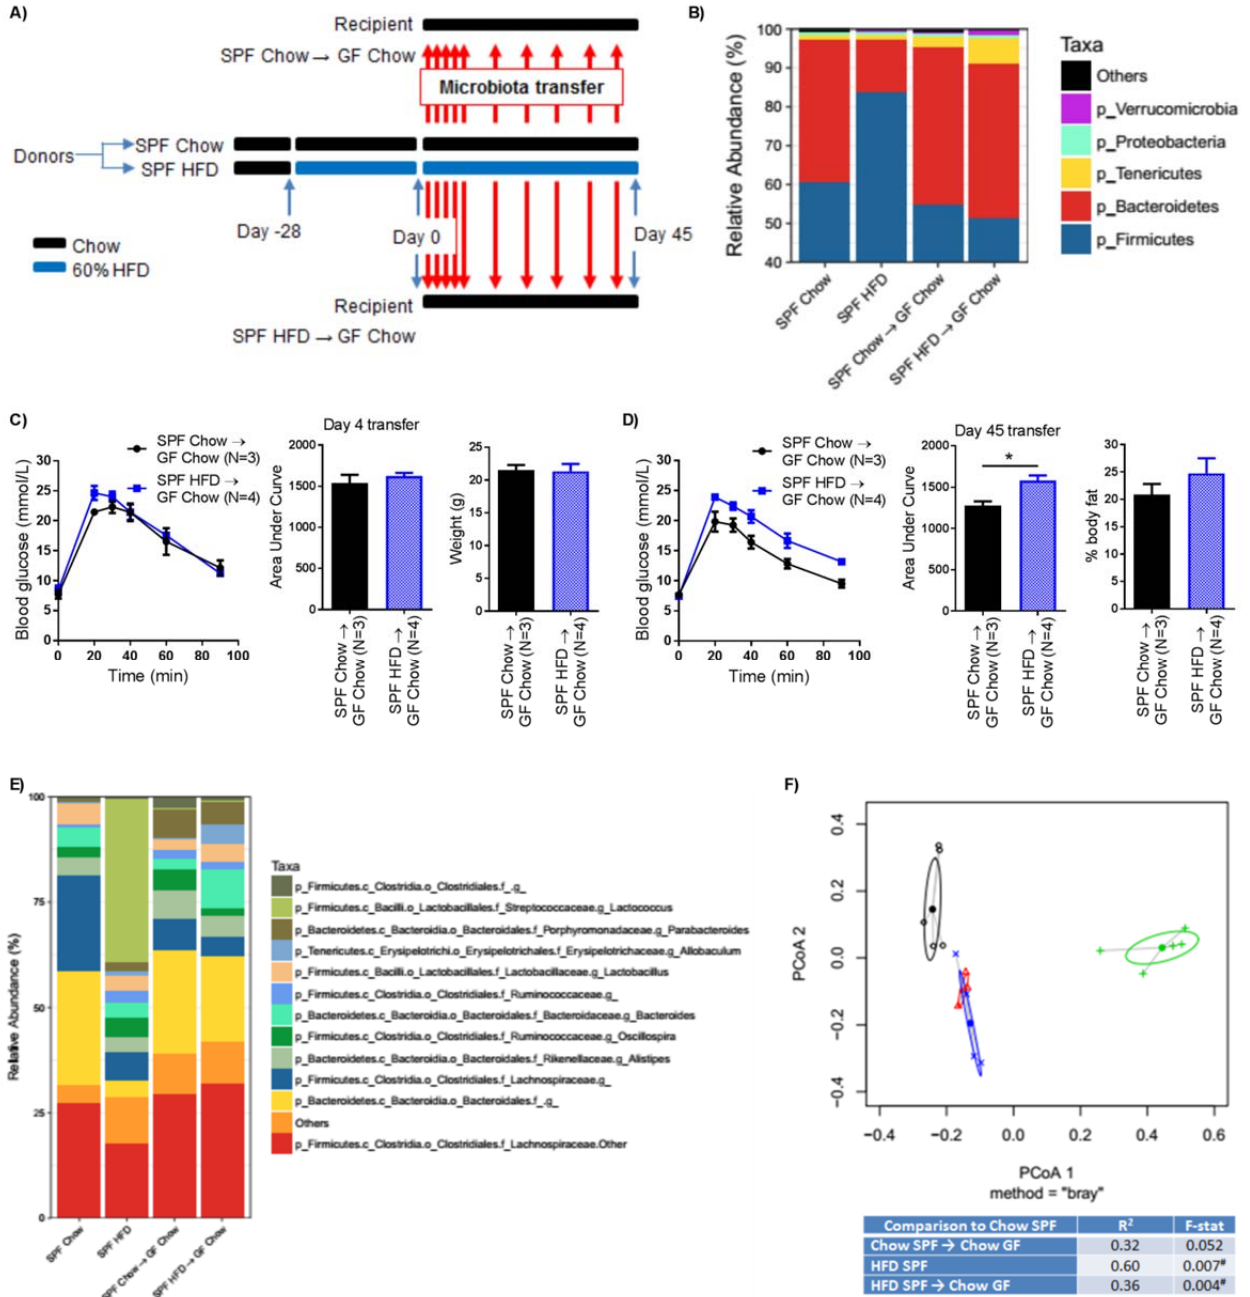

505  
506  
507  
508  
509  
510  
511  
512  
513  
514  
515

516 **Figure 6: Long-term, but not short term HFD-induced dysbiosis is sufficient for**  
517 **transmissible glucose intolerance, independent of changes in adiposity.** A) Schematic of  
518 experimental design. Donor mice were placed on chow or 60% HFD on Day -28. On Day 0, and  
519 each subsequent day, feces were transferred from donor chow or donor HFD cages to germ-free  
520 recipients fed chow diet. After 7 days feces were transferred once per week. B) Phylum level  
521 abundance of donor and germ free recipient feces after 45 days of microbiota transfer. On Day 4  
522 (C) or Day 45 (D) of microbiota transfer germ-free recipient mice were tested for glucose  
523 tolerance (N=3, 4). GTT, AUC, and weight or % body fat are shown. Statistical significance was  
524 measured with a Student t-test (\* $p < 0.05$ ). E) Genus level abundance of donor and germ free  
525 recipient feces after 45 days of microbiota transfer. F) PCoA on Bray-Curtis dissimilarities  
526 (black = SPF Chow; green = SPF HFD; red = SPF Chow → GF Chow; blue = SPF HFD → GF  
527 Chow) and sources of variation due to each treatment assessed by PERMANOVA relative to the  
528 microbial profile in Chow donor mice (Day 45).  
529  
530  
531  
532  
533

534

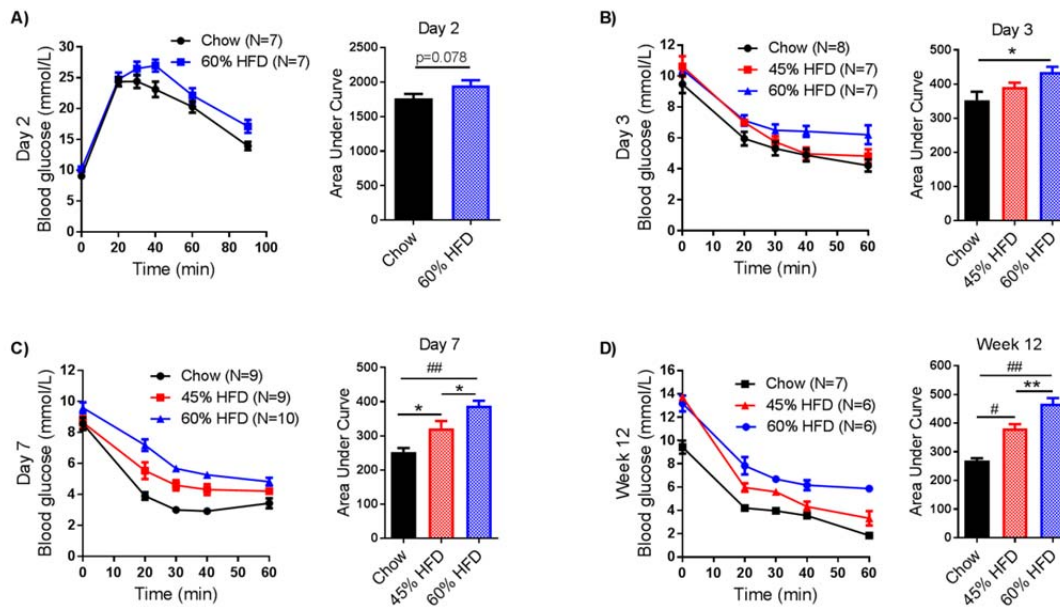

535

536

537 **Supplemental Figure 1: Short term high fat feeding causes insulin intolerance in mice.** Mice  
 538 were fed a chow, 45% HFD, or 60% HFD for 2 days (A: N=7, N/A, 7), 3 days (B: N=8, 7, 7), 7  
 539 days (C: N=9, 9, 10), or 12 weeks (D: N=7, 6, 6) before being tested for glucose (A) or insulin  
 540 tolerance (*i.p.*) with doses of 2g/Kg (A), 1.2 U/Kg (B), 0.9 U/Kg (C), or 1 U/Kg (D).  
 541 Blood glucose measures were taken at indicated time points. Each figure shows the GTT/ITT  
 542 curve and AUC. Statistical significance was measured as p<0.05 using one-way ANOVA. Post  
 543 Hoc analysis was performed using Tukey's multiple comparisons test (\* p<0.05; \*\* p<0.01; #  
 544 p<0.001; ## p<0.0001).

545

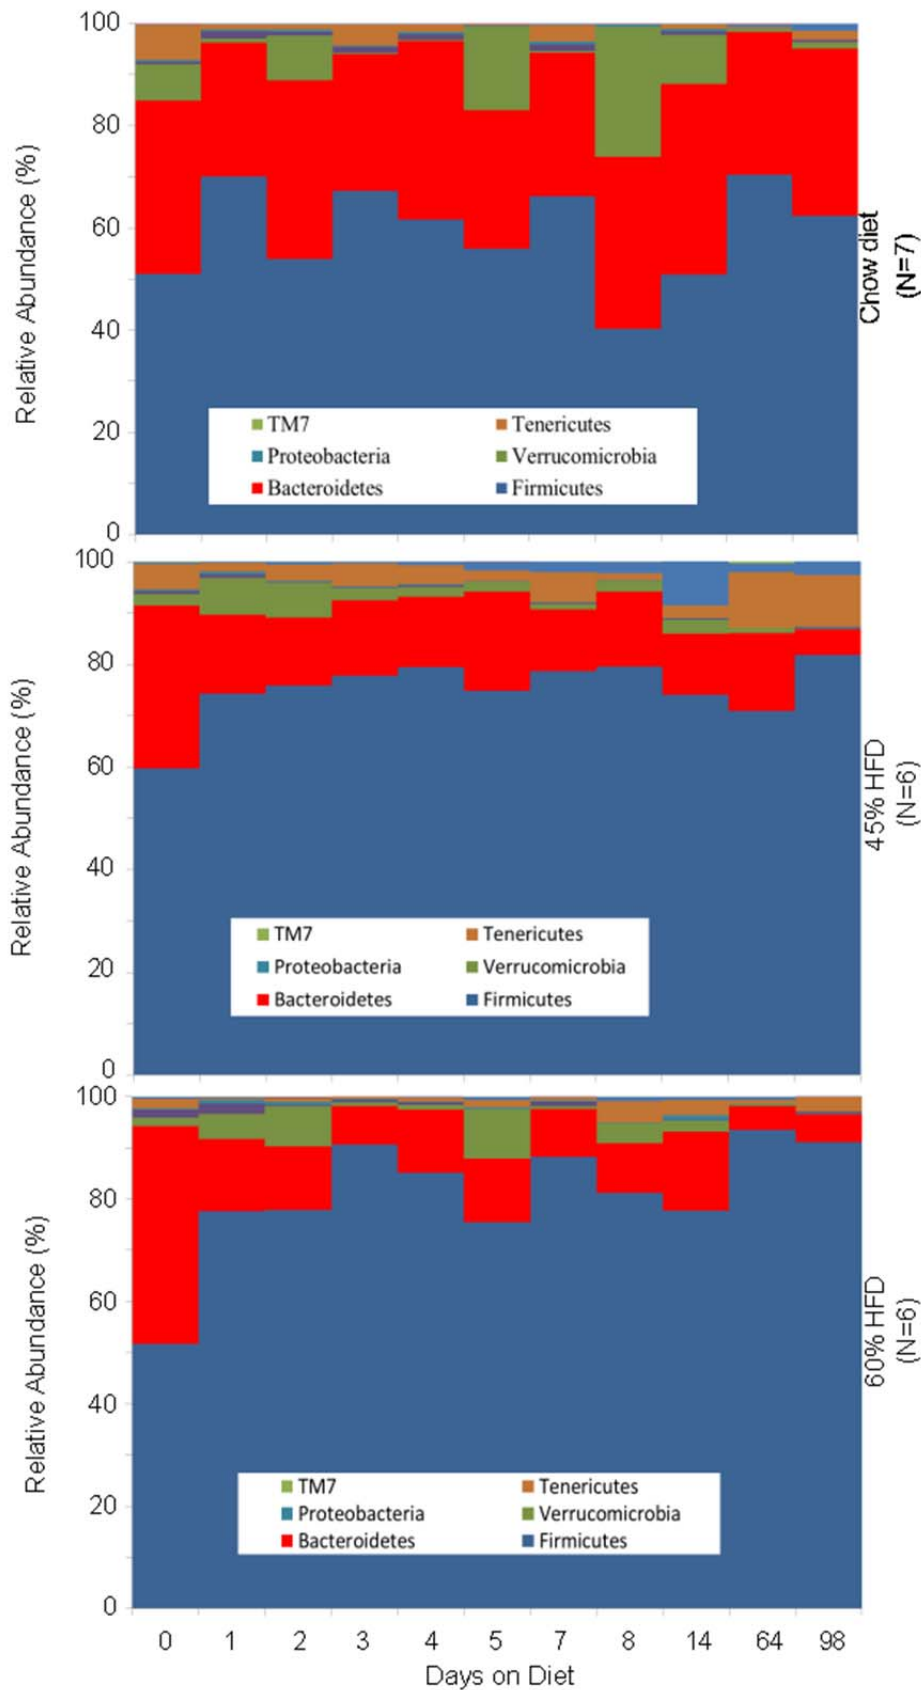

547 **Supplemental Figure 2: High fat feeding induces rapid changes in taxonomic composition**  
548 **of the fecal microbiome that remain stable over long-term feeding.** Phylum level changes in  
549 mouse feces samples collected from onset of chow (N=7), 45% (N=6), and 60% (N=6) HFD up  
550 to 14 weeks after the start of high fat feeding.

551

552

553

554

555

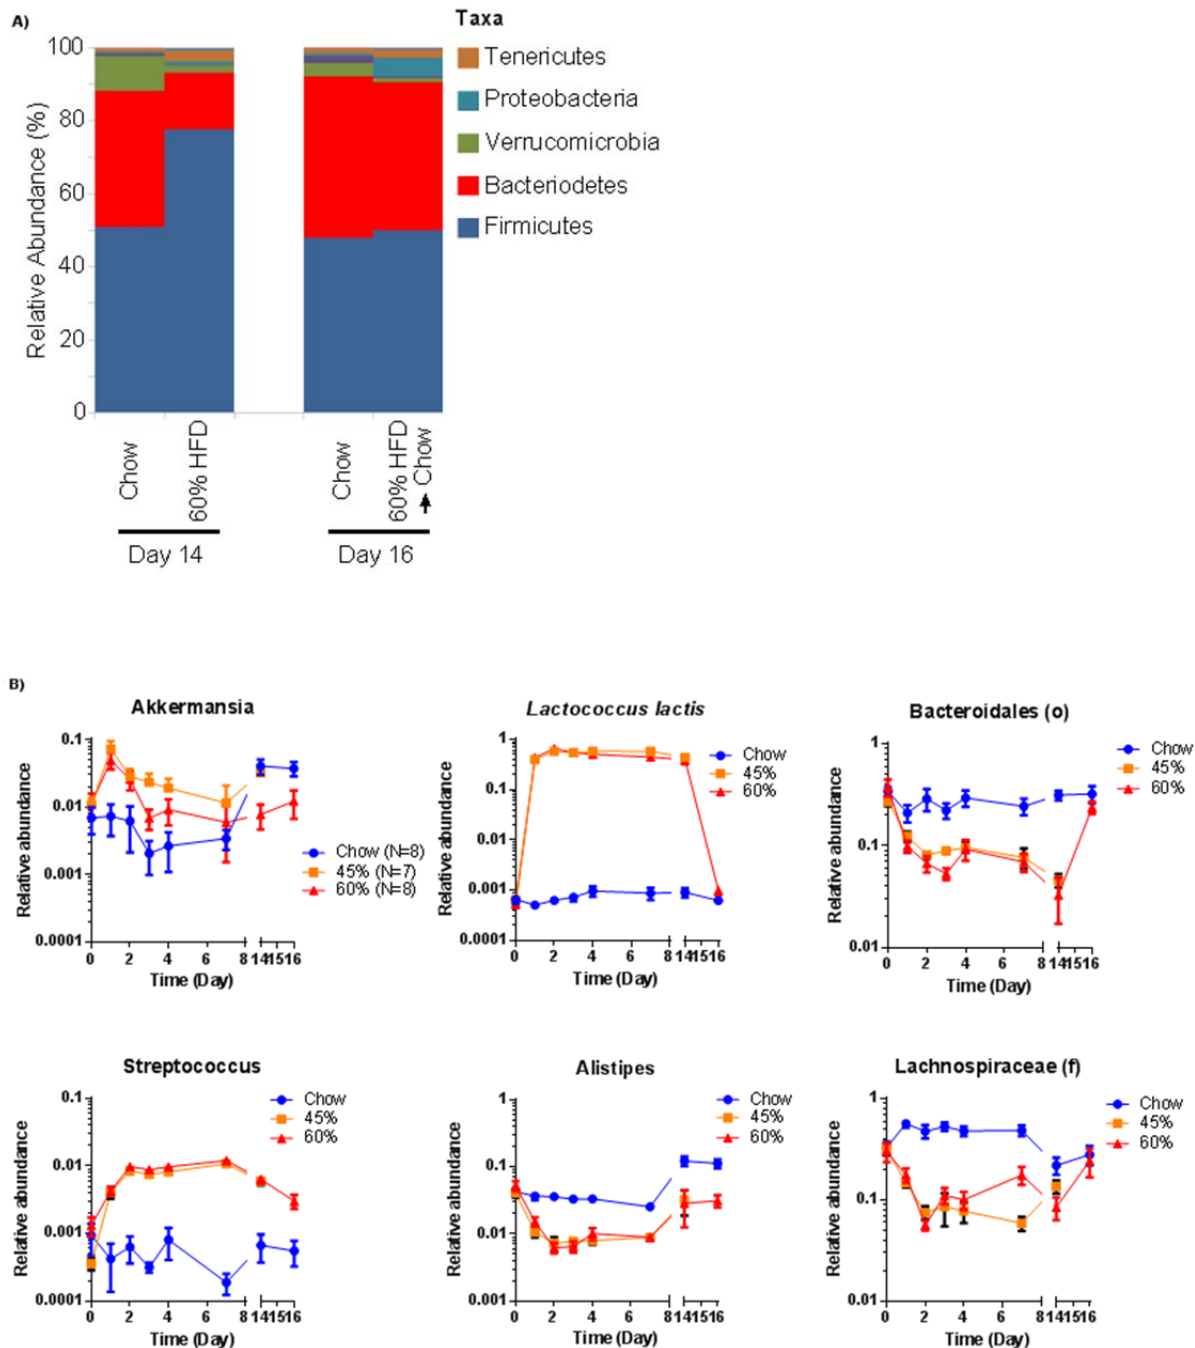

556

557 **Supplemental Figure 3: Dynamic changes in taxonomic composition of the fecal**  
 558 **microbiome of the onset and removal of a HFD in mice.** A) Phylum level abundance on Day  
 559 Day 14 versus Day 16 of mice fed a chow diet or 60% HFD before (Day 14) or after (Day 16) 2 days  
 560 of changing this 60% HFD back to a chow diet (N=8, 8). B) Relative abundance changes over 14  
 561 days of high fat feeding/2 days of diet removal back to a chow diet (N=8, 7, 8) for *Akkermansia*,  
 562 *Lactococcus lactis*, Bacteroidales (o), *Streptococcus*, *Alistipes* and Lachnospiraceae (f). Data are  
 563 mean + SEM.
